# Supplementary material for: Acrylamide-induced enhanced solubilization of poly(propylene glycol) in aqueous solution
Source: Royal Society of Chemistry journal article supplement (doi:10.1039/d3sm01362f), 2023-01-01
Supplement: d3sm01362f1.pdf [file d3sm01362f1.pdf]

Supporting Information for:

**Acrylamide-induced enhanced solubilization of Poly (propylene glycol) in Aqueous Solution**

Chao Zheng,<sup>1\*</sup> Yanlin Chen,<sup>1</sup> Feng Chen<sup>1</sup>

<sup>1</sup>Department of Applied Chemistry, College of Materials Science and Engineering, Chongqing Jiaotong University, Chongqing 400074, P. R. China.

\*To whom all correspondence should be addressed

E-mail: [zcphenix@163.com](mailto:zcphenix@163.com)

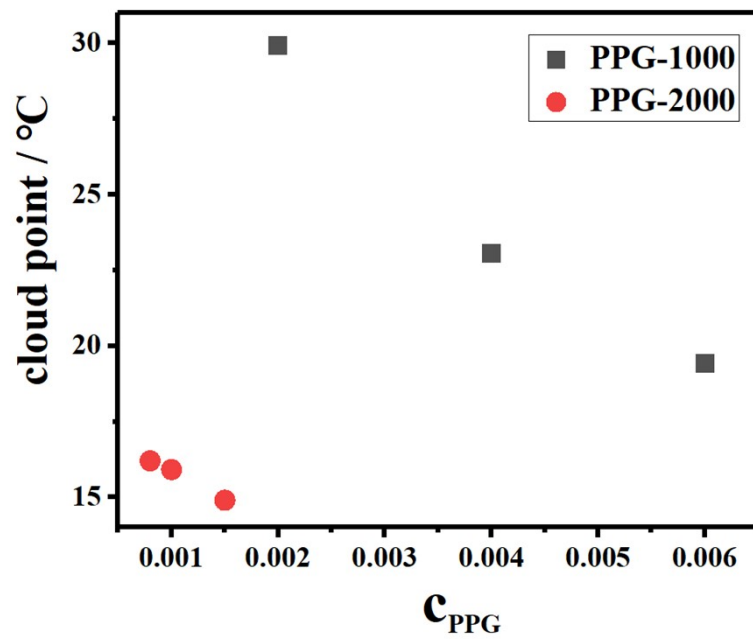

Figure S1. Partial phase diagram of PPG-1000 and PPG-2000 aqueous solution.

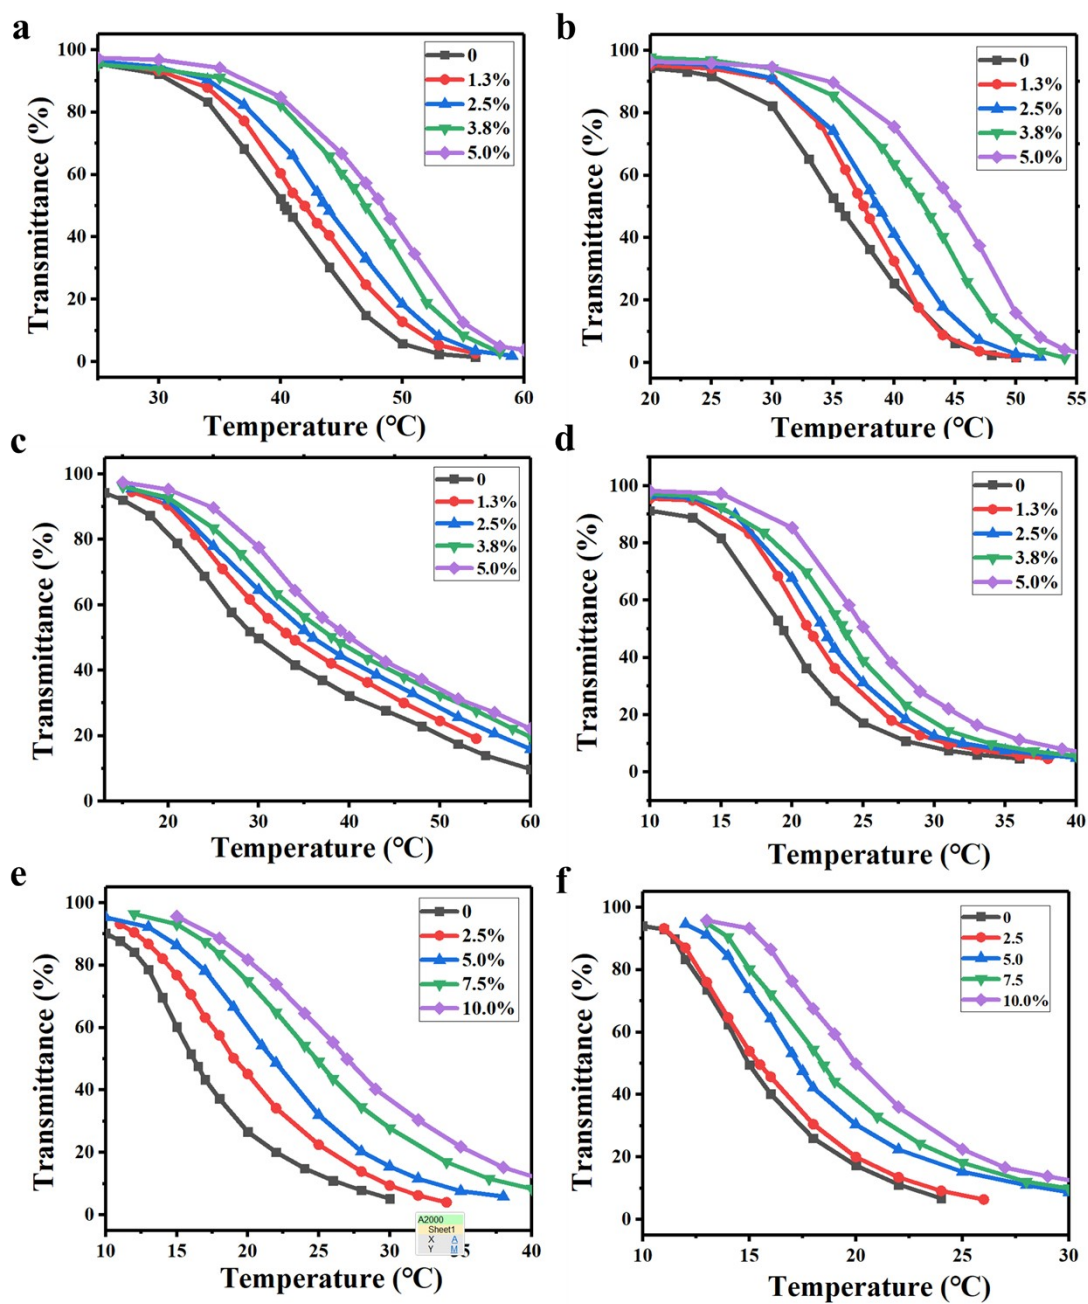

Figure S2. Temperature-dependent transmittance of PPG aqueous solution with different amounts of AM. (a) PPG-400,  $c_{\text{PPG}}=0.03$ , (b) PPG-400,  $c_{\text{PPG}}=0.05$ , (c) PPG-1000,  $c_{\text{PPG}}=0.002$ , (d) PPG-1000,  $c_{\text{PPG}}=0.006$ , (e) PPG-2000,  $c_{\text{PPG}}=0.0008$ , (f) PPG-2000,  $c_{\text{PPG}}=0.0015$ .

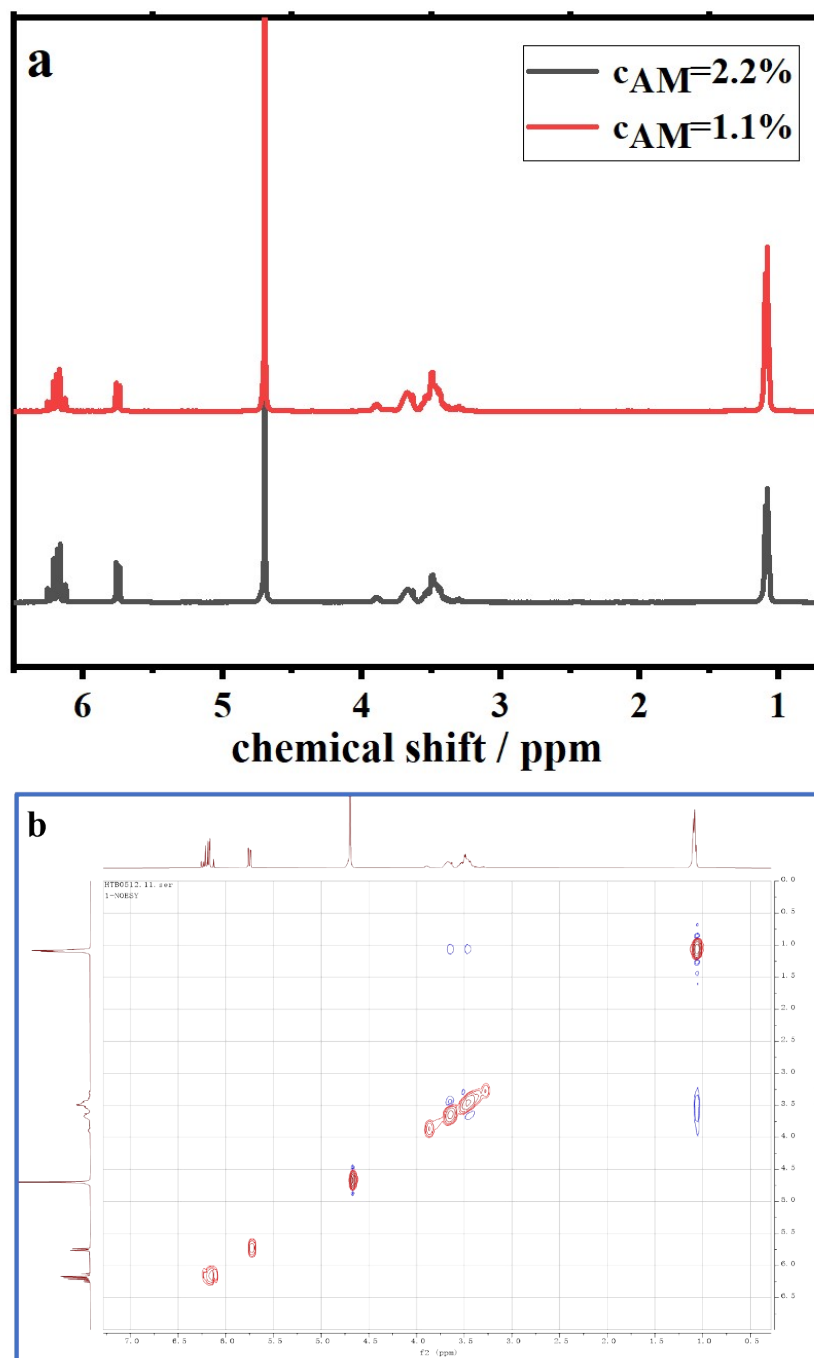

Figure S3. (a) Comparison in  $^1\text{H}$  NMR spectra of PPG with different amounts of AM in  $\text{D}_2\text{O}$  and (b) 2D NOESY Spectrum for PPG-600/AM in  $\text{D}_2\text{O}$  ( $c_{\text{PPG-600}}=0.03$ ,  $c_{\text{AM}}=1.1\%$ ).

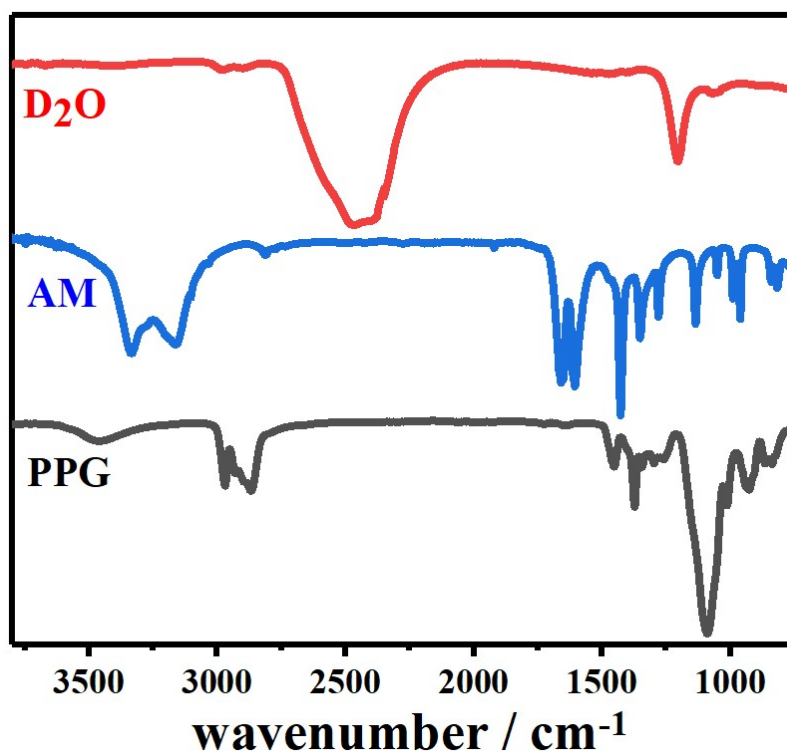

Figure S4. Comparison in FTIR spectra of D<sub>2</sub>O, Am and PPG.
